# Supplementary material
Source: PubMed Central journal article supplement (PMC4794034)

**Appendix 3: Supplementary figures [posted as supplied by author]**

**Fig A: Methodological quality of the randomized controlled trials**

|                            | Random sequence generation (selection bias) | Allocation concealment (selection bias) | Blinding of participants and personnel (performance bias) | Blinding of outcome assessment (detection bias): Clinical outcomes | Blinding of outcome assessment (detection bias): Pharmacokinetic outcomes | Incomplete outcome data (attrition bias): Clinical outcomes | Incomplete outcome data (attrition bias): Pharmacokinetic outcomes | Selective reporting (reporting bias) | Other bias |
|----------------------------|---------------------------------------------|-----------------------------------------|-----------------------------------------------------------|--------------------------------------------------------------------|---------------------------------------------------------------------------|-------------------------------------------------------------|--------------------------------------------------------------------|--------------------------------------|------------|
| Abdallah 2010 (75)         | ?                                           | ?                                       | -                                                         | ?                                                                  | ?                                                                         | ?                                                           | ?                                                                  | ?                                    |            |
| Alloway 2012 (63)          | ?                                           | ?                                       | -                                                         | ?                                                                  | ?                                                                         | +                                                           | +                                                                  | +                                    | +          |
| David-Neto 2004 (34)       | +                                           | ?                                       | ?                                                         |                                                                    | ?                                                                         |                                                             | +                                                                  | +                                    |            |
| First 1998 (58)            | ?                                           | ?                                       | ?                                                         | ?                                                                  | ?                                                                         | +                                                           | +                                                                  | +                                    |            |
| Fisher 1999 (59)           | ?                                           | ?                                       | +                                                         | ?                                                                  | ?                                                                         | ?                                                           | ?                                                                  | -                                    | +          |
| Hibberd 2006 (38)          | ?                                           | ?                                       | -                                                         |                                                                    | ?                                                                         |                                                             | +                                                                  | +                                    |            |
| Khatami 2013 (62)          | +                                           | +                                       | +                                                         | ?                                                                  | ?                                                                         | +                                                           | +                                                                  | +                                    |            |
| Kim 1998 (40)              | ?                                           | ?                                       | ?                                                         | ?                                                                  | ?                                                                         | ?                                                           | ?                                                                  | +                                    |            |
| Leet 2009 (42)             | ?                                           | ?                                       | -                                                         | ?                                                                  | ?                                                                         | +                                                           | +                                                                  | +                                    | +          |
| Masri 1996 (61)            | ?                                           | ?                                       | ?                                                         | ?                                                                  | ?                                                                         | ?                                                           | ?                                                                  | +                                    |            |
| Min 2013 (68)              | +                                           | ?                                       | -                                                         | ?                                                                  | ?                                                                         | -                                                           | -                                                                  | +                                    |            |
| Qazi 2006 (47)             | ?                                           | ?                                       | ?                                                         | ?                                                                  | ?                                                                         | +                                                           | +                                                                  | +                                    | -          |
| Robertsen 2014 (74)        | +                                           | +                                       | -                                                         |                                                                    | ?                                                                         |                                                             | +                                                                  | +                                    | +          |
| Stephan 1998 (52)          | ?                                           | ?                                       | ?                                                         | ?                                                                  | ?                                                                         | +                                                           | +                                                                  | +                                    | -          |
| Sunder-Plassmann 2012 (78) | ?                                           | ?                                       | -                                                         | ?                                                                  | ?                                                                         | +                                                           | +                                                                  | +                                    |            |
| Toman 2002 (55)            | ?                                           | ?                                       | ?                                                         | ?                                                                  | ?                                                                         | +                                                           | +                                                                  | +                                    |            |
| Vitko 2010 (57)            | ?                                           | ?                                       | -                                                         | ?                                                                  | ?                                                                         | +                                                           | +                                                                  | +                                    |            |

**Fig B: Neoral serum creatinine kidney RCTs**

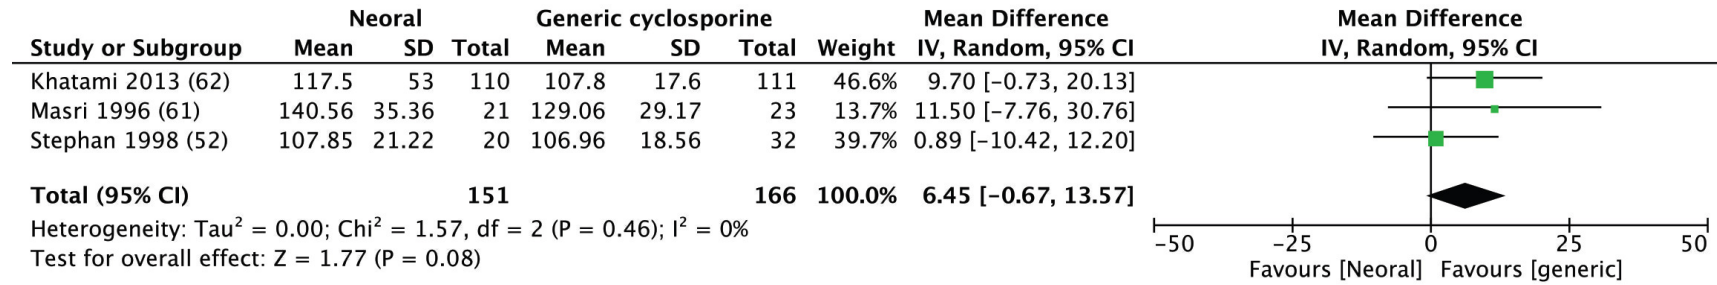

Supplement: mola025321.ww3_default.pdf [file mola025321.ww3_default.pdf]
