# Supplementary material
Source: PubMed Central journal article supplement (PMC4794034)
Supplement: mola025321.ww1_default.pdf [file mola025321.ww1_default.pdf]

# Appendix 1: Search strategy and data abstraction form [posted as supplied by author]

## Search Strategy

Database: Embase Classic+Embase <1947 to 2014 March 05>, Ovid MEDLINE(R) In-Process & Other Non-Indexed Citations and Ovid MEDLINE(R) <1946 to Present>

Search Strategy:

- 
- 1 Prograf.ti.ab. (602)
  - 2 Cellcept.tw. (2811)
  - 3 Myfortic.tw. (520)
  - 4 Neoral.tw. (5384)
  - 5 gengraf.tw. (160)
  - 6 Rapamune.tw. (1507)
  - 7 mycophenolic acid delayed release.tw. (0)
  - 8 Drugs, Generic/ (12249)
  - 9 generic.tw. (61271)
  - 10 or/1-9 (76022)
  - 11 Tacrolimus/ (63292)
  - 12 tacrolimus.tw. (28711)
  - 13 Mycophenolic Acid/ or mycophenolate mofetil.tw. (27000)
  - 14 Cyclosporine/ (90309)
  - 15 (Cyclosporine or Ciclosporin).tw. (62527)
  - 16 Sirolimus/ (47640)
  - 17 Sirolimus.tw. (14972)
  - 18 brand name\$.tw. (3182)
  - 19 or/11-18 (214342)
  - 20 10 and 19 (9511)
  - 21 organ transplantation/ or exp heart transplantation/ or exp kidney transplantation/ or liver transplantation/ or exp lung transplantation/ (421784)
  - 22 ((organ or kidney or renal or heart or cardiac or liver or hepatic or lung or pulmonary) adj2 (transplant\$ or graft\$)).tw. (366639)
  - 23 21 or 22 (488772)
  - 24 20 and 23 (5265)
  - 25 limit 24 to yr="1980 - 2014" (5259)
  - 26 25 use prmz (1058) Medline**
  
  - 27 prograf.ti.ab. (602)
  - 28 Cellcept.ti.ab. (481)
  - 29 Myfortic.ti.ab. (171)
  - 30 Neoral.ti.ab. (2205)
  - 31 gengraf.ti.ab. (19)
  - 32 Rapamune.ti.ab. (256)
  - 33 mycophenolic acid delayed release.ti.ab. (0)
  - 34 \*generic drug/ (6271)
  - 35 generic.tw. (61271)
  - 36 or/27-35 (66509)
  - 37 tacrolimus/ (63292)
  - 38 Tacrolimus.tw. (28711)

- 39 mycophenolic acid 2 morpholinoethyl ester/ (33579)
- 40 (mycophenolate mofetil or Mycophenolic acid).tw. (20317)
- 41 cyclosporin/ (90309)
- 42 (Cyclosporine or Ciclosporin).tw. (62527)
- 43 Sirolimus.tw. (14972)
- 44 brand name\$.tw. (3182)
- 45 or/37-44 (194781)
- 46 36 and 45 (4869)
- 47 organ transplantation/ or heart transplantation/ or kidney transplantation/ or liver transplantation/ or lung transplantation/ (401807)
- 48 ((organ or kidney or renal or heart or cardiac or liver or hepatic or lung or pulmonary) adj2 (transplant\$ or graft\$)).tw. (366639)
- 49 47 or 48 (482876)
- 50 46 and 49 (2430)
- 51 limit 50 to yr="1980 - 2014" (2424)
- 52 **51 use emczd (1380) Embase**
  
- 53 26 or 52 (2438)
- 54 remove duplicates from 53 (1559)

Search was repeated September 4<sup>th</sup>, 2014

## Data abstraction form

### Generic Immunosuppressant Review: Data Abstraction Form

Reviewer's Initials: \_\_\_\_\_ Reference ID Number \_\_\_\_\_

Lead Author: \_\_\_\_\_

Journal: \_\_\_\_\_ Year: \_\_\_\_\_

Language of Publication:            1. English            2. Other (specify) \_\_\_\_\_

Country(ies) of Study Origin: \_\_\_\_\_ Lebanon \_\_\_\_\_

### Immunosuppressants Compared in the Study

Trade Name

Generic (record specific name of generic,  
ie Tacrobell)

1. Prograf
2. Cellcept
3. Neoral

1. tacrolimus
2. mycophenolic acid
3. cyclosporine (microemulsion)

### Patients Included in the Study

Transplant Organ:    Lung            Liver            Kidney            Pancreas            Heart

Other: \_\_\_\_\_

New Transplants:    yes    no

Pediatric

Adult

### Type of Study

Experimental

1. Randomized parallel group trial
2. Cross over trial
3. Planned before/after (ie investigators switched the drug)
4. Other: \_\_\_\_\_

Observational

1. Cohort, prospective
2. Cohort, retrospective

3. Before/after prospective
4. Before/after retrospective
5. Other (specify)\_\_\_\_\_

For before/after studies, was there one to one dose conversion (y/n) \_\_\_\_\_  
 Were dose titrations allowed (y/n) \_\_\_\_\_  
 Were target drug levels reported in the study? \_\_\_\_\_

**If the study has more than one relevant time period, please record data for both/all**

**Drug Dosages and Monitoring**

If not reported, write n/a

**Generic Drug Group**

Dose or weight normalized dose (circle one): Mean (SD) or Median (IQR)  
 (circle one)

\_\_\_\_\_ (time period \_\_\_\_\_) p value \_\_\_\_\_

\_\_\_\_\_ (time period \_\_\_\_\_) p value \_\_\_\_\_

\_\_\_\_\_ (time period \_\_\_\_\_) p value \_\_\_\_\_  
 (record units)

Number of patients requiring a change in dosage: \_\_\_\_\_

Dose increased \_\_\_\_\_ Dose decreased \_\_\_\_\_

Drug level: How specifically was drug level reported (ie dose normalized level, trough, C2)? \_\_\_\_\_

**Mean (SD) or Median (IQR) (circle one)**

\_\_\_\_\_ (time period \_\_\_\_\_) p value \_\_\_\_\_

\_\_\_\_\_ (time period \_\_\_\_\_) p value \_\_\_\_\_

\_\_\_\_\_ (time period \_\_\_\_\_) p value \_\_\_\_\_  
 (record units)

**Trade Name Drug Group**

Dose or weight normalized dose (circle one): Mean (SD) or Median (IQR)

(circle one)

\_\_\_\_\_ (time period \_\_\_\_\_)

\_\_\_\_\_ (time period \_\_\_\_\_)

\_\_\_\_\_ (time period \_\_\_\_\_)

(record units)

Number of patients requiring a change in dosage: \_\_\_\_\_

Drug level: How specifically was drug level reported? \_\_\_\_\_

Mean (SD) or Median (IQR) (circle one) \_\_\_\_\_ (record units)

\_\_\_\_\_ (time period \_\_\_\_\_)

\_\_\_\_\_ (time period \_\_\_\_\_)

\_\_\_\_\_ (time period \_\_\_\_\_)

(record units)

### Outcomes

If more than one relevant time period or type of transplant, record that data above the table and fill in one table for each time period and/or type of transplant

\_\_\_\_\_

Please report data for all continuous variables as Mean (+/- Standard Deviation)

| Variable              | Generic group | Trade Name group | P value | Total | Follow up time |
|-----------------------|---------------|------------------|---------|-------|----------------|
| Subjects enrolled (n) |               |                  |         |       |                |
| Subjects analyzed (n) |               |                  |         |       |                |
| Men/Women             |               |                  |         |       |                |
| Age                   |               |                  |         |       |                |
| Acute rejection (n)   |               |                  |         |       |                |
| Graft loss (n)        |               |                  |         |       |                |
| Infection (n)         |               |                  |         |       |                |
| Death (n)             |               |                  |         |       |                |

\_\_\_\_\_

Please report data for all continuous variables as Mean (+/- Standard Deviation)

| Variable | Generic group | Trade Name | P value | Total | Follow up time |
|----------|---------------|------------|---------|-------|----------------|
|----------|---------------|------------|---------|-------|----------------|

|                       |  |              |  |  |  |
|-----------------------|--|--------------|--|--|--|
|                       |  | <b>group</b> |  |  |  |
| Subjects enrolled (n) |  |              |  |  |  |
| Subjects analyzed (n) |  |              |  |  |  |
| Men/Women             |  |              |  |  |  |
| Age                   |  |              |  |  |  |
| Acute rejection (n)*  |  |              |  |  |  |
| Graft loss (n)        |  |              |  |  |  |
| Infection (n)         |  |              |  |  |  |
| Death (n)             |  |              |  |  |  |

\*Record how this was defined (ie biopsy proven)

### Renal Function

If more than one relevant time period or type of transplant, record that data above the table and fill in one table for each time period and/or type of transplant

Please report data for all continuous variables as Mean (+/- Standard Deviation)

| <b>Variable</b>             | <b>Generic group</b> | <b>Trade Name group</b> | <b>Follow up time*</b> | <b>P value</b> |
|-----------------------------|----------------------|-------------------------|------------------------|----------------|
| Absolute creatinine (units) |                      |                         |                        |                |
| Absolute eGFR               |                      |                         |                        |                |

Please report data for all continuous variables as Mean (+/- Standard Deviation)

| <b>Variable</b>             | <b>Generic group</b> | <b>Trade Name group</b> | <b>Follow up time</b> | <b>P value</b> |
|-----------------------------|----------------------|-------------------------|-----------------------|----------------|
| Absolute creatinine (units) |                      |                         |                       |                |
| Absolute eGFR               |                      |                         |                       |                |

### For Bioequivalence Studies Only

Please report data for all continuous variables as Mean (+/- Standard Deviation)

| <b>Variable</b>  | <b>Generic group</b> | <b>Trade Name group</b> | <b>P value</b> |
|------------------|----------------------|-------------------------|----------------|
| AUC ( )*         |                      |                         |                |
| C <sub>max</sub> |                      |                         |                |
| T max            |                      |                         |                |
| C <sub>0</sub>   |                      |                         |                |

\*(record time period)

$C_{\max}$  mean ratio (90% CI) \_\_\_\_\_ AUC mean ratio (90% CI) \_\_\_\_\_

$C_0$  mean ratio (90% CI) \_\_\_\_\_

### **Quality Assessment**

For RCT's, fill out the Cochrane Risk of Bias Assessment Tool

Wells et al. criteria for observational studies
