# Supplementary material
Source: PubMed Central journal article supplement (PMC4794034)
Supplement: mola025321.ww2_default.pdf [file mola025321.ww2_default.pdf]

## Appendix 2: Characteristics of eligible studies [posted as supplied by author]

Table A: Neoral study characteristics

| Study, year                    | Country        | Study Design                                                                                          | Transplant organ | Inclusion Criteria                                                                                                                                                         | Exclusion Criteria                                                                                                            | Generic     | Number of patients (total) | Mean age (Total study or I/G) |
|--------------------------------|----------------|-------------------------------------------------------------------------------------------------------|------------------|----------------------------------------------------------------------------------------------------------------------------------------------------------------------------|-------------------------------------------------------------------------------------------------------------------------------|-------------|----------------------------|-------------------------------|
| Khatami, 2013 <sup>62</sup>    | Iran           | Randomized parallel group                                                                             | Kidney           | Incident adult transplants                                                                                                                                                 | Hyperoxaluria. Primary focal segmental glomerulosclerosis. History of malignancy in the last 5 years. Re-transplant. PRA >25% | Iminoral    | 221                        | 38.1 (12.6)/39.3 (13.2)       |
| Vitko, 2010 <sup>57</sup>      | Czech Republic | Randomized parallel group                                                                             | Kidney           | Transplanted between 1 and 10 years prior to enrollment. Stable graft function. No rejection in the last 6 months. Stable dose of cyclosporine                             | None specified                                                                                                                | Equoral     | 99                         | 43.4 (11.6)/ 41.1 (12.5)      |
| Qazi, 2006 <sup>47</sup>       | USA            | Randomized parallel group (10% to Neoral and 90% to Gengraf). Before/after comparisons in Gengraf arm | Kidney           | At least 6 months post transplant. Stable graft function. Stable cyclosporine levels                                                                                       | None specified                                                                                                                | Gengraf     | 82                         | 47.5 (5)                      |
| Hibberd, 2006 <sup>38</sup>    | Australia      | Randomized cross over trial                                                                           | Kidney           | Stable transplant recipients. At least 6 months post transplant                                                                                                            | None specified                                                                                                                | Cysporin    | 28                         | 53 (10)                       |
| David-Neto, 2004 <sup>34</sup> | Brazil         | Randomized cross over trial                                                                           | Kidney           | Stable prevalent transplants. Age 18-60. Stable cyclosporine dose                                                                                                          | History of active cancer                                                                                                      | Zinograf-ME | 18                         | 44.7 (12)                     |
| First, 1998 <sup>58</sup>      | USA            | Randomized cross over trial                                                                           | Kidney           | Body weight between 45 to 155 kg. >6 months post transplant. Stable allograft function. No rejection episodes in the last 6 months. No recent change in cyclosporine dose  | Multi-organ transplants. Unstable medical problems                                                                            | Sang-35     | 32                         | Not reported                  |
| Kim, 1998 <sup>40</sup>        | South Korea    | Randomized parallel group trial                                                                       | Kidney           | Incident living donor transplants. Adults                                                                                                                                  | None specified                                                                                                                | Neoplanta   | 40                         | 40 (11.9)/ 37.2 (9.3)         |
| Stephan, 1998 <sup>52</sup>    | USA            | Randomized parallel group trial                                                                       | Kidney           | Incident transplants                                                                                                                                                       | None specified                                                                                                                | Consupren   | 36                         | Not reported                  |
| Masri, 1996 <sup>61</sup>      | Lebanon        | Randomized parallel group trial                                                                       | Kidney           | Prevalent transplants. Unstable Sandimmune pharmacokinetics and Cmax <400 ng/ml. Tmax >3.5 hrs. Broad Cmax. Unstable serum creatinine (>10% variation over 3 measurements) | None specified                                                                                                                | Consupren   | 44                         | 33/32                         |
| Fisher, 1999 <sup>59</sup>     | USA            | Randomized cross over trial                                                                           | Liver            | Stable liver and renal function. More than 1 year post transplant                                                                                                          | None specified                                                                                                                | SangCya     | 26                         | 52 (10)                       |
| Leet, 2009 <sup>42</sup>       | Australia      | Randomized cross over trial                                                                           | Heart            | At least 15 months post transplant. Stable dose of cyclosporine. Stable renal function. No rejection in the last 6 months                                                  | Comorbidities. Sirolimus use                                                                                                  | Cysporin    | 16                         | 60.06 (8.45)                  |
| Toman,                         | Czech          | Randomized parallel group                                                                             | Heart            | At least 6 months post                                                                                                                                                     | None specified                                                                                                                | Consupren   | 10                         | 51.2 (12)/ 49.8 (10)          |

|                                |                                           |                                                         |        |                                                                                                                                   |                                                                                                                                                                                                             |                         |                          |                                                          |
|--------------------------------|-------------------------------------------|---------------------------------------------------------|--------|-----------------------------------------------------------------------------------------------------------------------------------|-------------------------------------------------------------------------------------------------------------------------------------------------------------------------------------------------------------|-------------------------|--------------------------|----------------------------------------------------------|
| 2002 <sup>55</sup>             | Republic                                  | trial                                                   |        | transplant. Clinically stable. Stable cyclosporine levels. No significant infection                                               |                                                                                                                                                                                                             |                         |                          |                                                          |
| Al Wakeel, 2008 <sup>32</sup>  | Saudi Arabia/Middle East                  | Interventional before/after                             | Kidney | Minimum transplant age of 6 months. Stable graft function                                                                         | None specified                                                                                                                                                                                              | Sigmasporin<br>Microral | 42                       | 37.9 (11.1)                                              |
| Al Wakeel, 2008 <sup>31</sup>  | Saudi Arabia/Middle East                  | Interventional before/after                             | Kidney | Minimum transplant age of 6 months. Stable graft function                                                                         | None specified                                                                                                                                                                                              | Sigmasporin<br>Microral | 75                       | 38.9 (10.7)                                              |
| Sayyah, 2007 <sup>49</sup>     | Iran                                      | Interventional before/after                             | Kidney | Clinically stable for at least 2 months                                                                                           | Severe infections. Liver dysfunction. Malignancy                                                                                                                                                            | Iminoral                | 41                       | 40.12 (13.37)                                            |
| Masri, 2005 <sup>44</sup>      | Turkey, Lebanon, Pakistan                 | Interventional before/after                             | Kidney | Prevalent transplants. First transplant. No rejection in the past 6 months                                                        | Any of the following within 14 days of study entry: myocardial infarction, condition that might compromise GI tract, liver or kidney function, condition that might influence cyclosporine pharmacokinetics | Equoral                 | 70                       | 33                                                       |
| Fradette, 2005 <sup>37</sup>   | Canada                                    | Interventional before/after                             | Kidney | At least 6 months post transplant. Stable graft function                                                                          | None specified                                                                                                                                                                                              | Pliva                   | 37                       | 49.2                                                     |
| Perlik, 2005 <sup>46</sup>     | Czech Republic                            | Interventional before/after                             | Kidney | Stable transplant recipients. No rejection in the past 6 months                                                                   | Significant co-morbidities. Interacting medications                                                                                                                                                         | Equoral                 | 70                       | Males: 35.3. Females: 34.7                               |
| Talaulikar, 2004 <sup>54</sup> | Australia                                 | Interventional before/after                             | Kidney | More than 3 months post transplant                                                                                                | Liver disease. Instability of graft function. Change of Neoral dose in the last 3 months                                                                                                                    | Cysporin                | 40                       | 49.8 (11.4)                                              |
| Masri, 2004 <sup>43</sup>      | Turkey, Pakistan, Lebanon, Czech Republic | Interventional before/after                             | Kidney | First renal transplant. No rejection in the last 6 months. Stable graft function                                                  | Hepatic dysfunction. CMV infection in the last 6 months                                                                                                                                                     | Equoral                 | Not reported             | Not reported                                             |
| Durlik, 2003 <sup>36</sup>     | Poland                                    | Interventional before/after                             | Kidney | At least 6 months post first renal transplant. Stable graft function. On Neoral for at least 3 months. Age 18 to 65 years         | None specified                                                                                                                                                                                              | Cicloral                | 42                       | 42.5                                                     |
| Tsang, 2003 <sup>56</sup>      | Hong Kong                                 | Interventional before/after                             | Kidney | At least 3 months post transplant. On a stable dose of Neoral. No interacting medications. Stable graft function. Age 18-65 years | Conditions or drugs that would alter cyclosporine metabolism and clearance. Pregnancy                                                                                                                       | Gengraf                 | 20                       | 48.4 (10.7)                                              |
| Roza, 2002 <sup>48</sup>       | USA                                       | Interventional before/after                             | Kidney | At least 6 months post transplant. Medically stable                                                                               | Significant medical issues. Taking drugs that influenced cyclosporine metabolism. Pregnancy                                                                                                                 | Gengraf                 | 50                       | 49.8 (11.4)                                              |
| Gaston, 1999 <sup>60</sup>     | USA                                       | Interventional before/after                             | Kidney | Stable adult transplant recipients.                                                                                               | None specified                                                                                                                                                                                              | SangCya                 | 32                       | Not reported                                             |
| Pamugas, 2012 <sup>45</sup>    | Philippines                               | Prospective cohort                                      | Kidney | Age 18-65 years. Living donor. PRA <10%. Incident transplants                                                                     | CMV positive donor to CMV negative recipient. Pulmonary TB. Treatment with medications known to interact with cyclosporine                                                                                  | Arpimune                | 60                       | 38.3 (9.3)/ 36.4 (6)                                     |
| Diarra, 2010 <sup>35</sup>     | Austria                                   | Before/after                                            | Kidney | Stable graft function. Prevalent transplants                                                                                      | None specified                                                                                                                                                                                              | Equoral                 | 59                       | 54 (16)                                                  |
| Kahn, 2010 <sup>39</sup>       | South Africa                              | Retrospective cohort with historical controls (incident | Kidney | Prevalent transplants: stable graft function                                                                                      | None specified                                                                                                                                                                                              | Cicloral                | Incident transplant: 49. | Incident transplants: 39.5/ 41.9. Prevalent transplants: |

|                               |           | transplants). Retrospective before/after (prevalent transplants) |        |                                                                                                                                                |                                                                                                     |          | Prevalent transplants: 117 | Not specified           |
|-------------------------------|-----------|------------------------------------------------------------------|--------|------------------------------------------------------------------------------------------------------------------------------------------------|-----------------------------------------------------------------------------------------------------|----------|----------------------------|-------------------------|
| Spasovski, 2008 <sup>51</sup> | Macedonia | Retrospective cohort                                             | Kidney | Incident living donor recipients. Neoral: 2003. Equoral: 2006                                                                                  | None specified                                                                                      | Equoral  | 31                         | 38.6 (5.1)/ 39.6 (7.6)  |
| Sharma, 2006 <sup>50</sup>    | India     | Prospective cohort                                               | Kidney | Incident transplants from November 2003 to March 2005                                                                                          | None specified                                                                                      | Arpimune | 37                         | 28.1 (9.5)/ 30.55 (9.8) |
| Taber, 2005 <sup>53</sup>     | USA       | Retrospective cohort                                             | Kidney | Incident transplants. Neoral group: Transplanted between January 1999 and May 2001. Gengraf group: transplanted between May 2001 and July 2002 | Graft failure within 14 days post transplant. Incomplete data collection                            | Gengraf  | 188                        | 48.7/ 51.2              |
| Carnahan, 2003 <sup>33</sup>  | USA       | Prospective before/after                                         | Kidney | Prevalent transplants                                                                                                                          | Already taking another generic preparation                                                          | Gengraf  | 46                         | 50.5                    |
| Kraeuter, 2013 <sup>41</sup>  | Germany   | Retrospective before/after                                       | Heart  | Clinically stable adult chronic transplant patients transplanted from 1989 to 2009                                                             | No rejection episodes at the time of conversion. Lack of patient adherence. Multi-organ transplants | Equoral  | 20                         | 60.7 (10)               |

I/G: I=Innovator; G= Generic

Table B: Prograf study characteristics

I/G: I=Innovator; G= Generic

\*Median (range)

| Study, year                         | Country        | Study Design                                                                                      | Transplant organ          | Inclusion Criteria                                                                                                                                | Exclusion Criteria                                                                                                         | Generic               | Number of patients (total)                        | Mean age (Total study or I/G)             |
|-------------------------------------|----------------|---------------------------------------------------------------------------------------------------|---------------------------|---------------------------------------------------------------------------------------------------------------------------------------------------|----------------------------------------------------------------------------------------------------------------------------|-----------------------|---------------------------------------------------|-------------------------------------------|
| Robertsen, 2014 <sup>74</sup>       | Norway         | Randomized cross over trial                                                                       | Kidney                    | Incident transplants 60 years of age or older                                                                                                     | None specified                                                                                                             | Tacni                 | 25                                                | 69 (60-78)*                               |
| Min, 2013 <sup>68</sup>             | South Korea    | Randomized parallel group trial followed by a crossover trial at 6 months in a subset of patients | Kidney                    | Adult incident transplant patients (living or deceased)                                                                                           | Kidney from donors after cardiac death. Infection. Liver disease. Previous non renal transplant. Malignancy within 5 years | Tacrobell             | 126                                               | 45.6 (12.4) / 47 (12.7)                   |
| Alloway, 2012 <sup>63</sup>         | USA            | Randomized cross over trial                                                                       | Kidney                    | At least 6 months post transplant. On a stable dose of tacrolimus                                                                                 | None specified                                                                                                             | Sandoz                | 71                                                | 52 (12.5)                                 |
| Rosenborg, 2014 <sup>69</sup>       | Sweden         | Interventional before/after                                                                       | Kidney                    | Stable renal function. Inclusion from January to December 2012                                                                                    | New transplants. Active neoplasm                                                                                           | Sandoz                | 67                                                | 57.6 (11)                                 |
| McDevitt-Potter, 2011 <sup>72</sup> | USA            | Interventional before/after                                                                       | Liver, Kidney, multiorgan | On a stable tacrolimus dose. Prevalent transplants                                                                                                | Changing tacrolimus trough target. Non adherent with monitoring. On a mixture of generic and brand products                | Sandoz                | 70<br>Liver n=28<br>Kidney n=27<br>Multiorgan n=5 | 52 (12)                                   |
| Heavner, 2013 <sup>66</sup>         | USA            | Retrospective cohort                                                                              | Kidney                    | Prograf group: admission to hospital from October to December 2009. Generic group: admission from December 2009 to February 2009                  | Transplant within 90 days of admission. New initiation of tacrolimus                                                       | Sandoz                | 78                                                | 51 / 54                                   |
| Marfo, 2013 <sup>67</sup>           | USA            | Retrospective before/after and retrospective cohort                                               | Kidney                    | Switched from brand-name to generic between 2009 and 2010                                                                                         | Less than 3 months post transplant                                                                                         | Any generic           | Before/after: 73<br>Cohort: 106                   | 51 (16) / 54 (13)                         |
| Connor, 2012 <sup>64</sup>          | United Kingdom | Retrospective cohort                                                                              | Kidney                    | Incident transplant patients. Prograf: Transplanted between November 2009 and November 2010. Generic: Transplanted between November 2010 and 2011 | None specified                                                                                                             | Adoport               | 99                                                | 52 / 57*                                  |
| Momper, 2011 <sup>73</sup>          | USA            | Retrospective before/after                                                                        | Liver, kidney             | Liver: at least 6 months post transplant. Kidney: at least 3 months post transplant. Conversion between August 2009 to April 2010                 | Non adherent with drug level monitoring. Co-prescribed interacting medications                                             | Sandoz                | 103<br>Liver: 48<br>Kidney: 55                    | Liver: 60.6 (10.9)<br>Kidney: 49.9 (15.1) |
| Spence, 2012 <sup>70</sup>          | USA            | Retrospective before/after                                                                        | Liver, kidney, heart      | Clinically stable with conversion to generic between October 1 <sup>st</sup> to December 31 <sup>st</sup> , 2010                                  | None specified                                                                                                             | Sandoz                | Liver: 29<br>Kidney: 193<br>Heart: 12             | 54 (12.9)                                 |
| Yu, 2012 <sup>71</sup>              | South Korea    | Prospective cohort with historical controls                                                       | Liver                     | Incident transplants                                                                                                                              | Over age 65. Severe infection                                                                                              | Tacrobell             | 117                                               | 51.2 (4.8)/ 48.7 (6.9)                    |
| Dhungel, 2013 <sup>65</sup>         | USA            | Retrospective cohort with historical controls                                                     | Heart                     | Incident transplants                                                                                                                              | None specified                                                                                                             | Generic not specified | 65                                                | 50.9 (16.5)/ 56.8 (10.2)                  |

Table C: Cellcept study characteristics

| Study, year                          | Country                     | Study Design                                | Transplant organ | Inclusion Criteria                                                                                | Exclusion Criteria | Generic                                    | Number of patients (total) | Mean age (Total study or I/G)                       |
|--------------------------------------|-----------------------------|---------------------------------------------|------------------|---------------------------------------------------------------------------------------------------|--------------------|--------------------------------------------|----------------------------|-----------------------------------------------------|
| Sunder-Plassmann, 2012 <sup>78</sup> | Multi-centre, International | Randomized cross over trial                 | Kidney           | At least 12 months post transplant. Stable renal function                                         | None specified     | Myfenax                                    | 43                         | 50.7 (13.5)                                         |
| Abdallah, 2010 <sup>75</sup>         | Tunisia                     | Randomized parallel group trial             | Kidney           | All incident transplants between January 2007 and December 2008                                   | None specified     | Mycophenolate mofetil 500 (Medis, Tunisia) | 18                         | 33.3 (11.7)/ 36.3 (7.1)                             |
| Videla, 2007 <sup>80</sup>           | Chile                       | Interventional before/after                 | Kidney           | Stable renal function                                                                             | None specified     | Linfonex                                   | 5                          | Not reported                                        |
| Danguilan, 2014 <sup>79</sup>        | Philippines                 | Prospective cohort with historical controls | Kidney           | 18-65 years of age. Incident transplants. Primary kidney transplant from a living donor. PRA <10% | None specified     | Mycept                                     | 56                         | Not reported 90% of patients between the ages 20-40 |
| Rutkowski, 2011 <sup>77</sup>        | Poland                      | Cohort                                      | Kidney           | Incident transplants from April 2009 to January 2011 (partner kidneys)                            | None specified     | Myfenax                                    | 15                         | 49/54.1                                             |
| Namgoong, 2013 <sup>76</sup>         | South Korea                 | Prospective before/after                    | Liver            | Transplant 2 years or more before the study with stable function                                  | None specified     | Myconol                                    | 53                         | 55.9 (7.1)                                          |

I/G: I=Innovator; G= Generic
