# Supplementary material
Source: PubMed Central journal article supplement (PMC4794034)
Supplement: mola025321.ww4_default.pdf [file mola025321.ww4_default.pdf]

**Appendix 4: Quality assessment of non-randomized studies [posted as supplied by author]**

| Study                                                   | Comparison of each intervention occurred   |                                                 | Method used to form intervention groups                | Retrospective (R) or prospective (P) study design | Confounding considered in the study design or analysis                    | Did the study have a protocol?* | Outcome of acute rejection |          |            | Outcome of drug levels/bioequivalence |          |          |
|---------------------------------------------------------|--------------------------------------------|-------------------------------------------------|--------------------------------------------------------|---------------------------------------------------|---------------------------------------------------------------------------|---------------------------------|----------------------------|----------|------------|---------------------------------------|----------|----------|
|                                                         | Between two or more groups of participants | Within the same group of participants over time |                                                        |                                                   |                                                                           |                                 | Pre-specified objective    | Measured | Analyzed** | Pre-specified objective               | Measured | Analyzed |
| Al Wakeel 2008 <sup>32</sup>                            | N                                          | Y                                               | Action of researchers                                  | P                                                 | N                                                                         | Y                               | N                          | N        | N          | Y                                     | Y        | Y        |
| Al Wakeel 2008 <sup>31</sup>                            | N                                          | Y                                               | Action of researchers                                  | P                                                 | N                                                                         | Y                               | Y                          | Y        | N          | Y                                     | Y        | Y        |
| Sayyah, 2007 <sup>49</sup>                              | N                                          | Y                                               | Action of researchers                                  | P                                                 | N                                                                         | Probably yes                    | N                          | N        | N          | Y                                     | Y        | Y        |
| Masri, 2005 <sup>44</sup>                               |                                            | Y                                               | Action of researchers                                  | P                                                 | N                                                                         | Probably yes                    | N                          | N        | N          | Y                                     | Y        | Y        |
| Fradette, 2005 <sup>37</sup>                            | N                                          | Y                                               | Action of researchers                                  | P                                                 | Y<br>Multivariable regression                                             | Probably yes                    | N                          | N        | N          | Y                                     | Y        | Y        |
| Perlik, 2005 <sup>46</sup>                              | N                                          | Y                                               | Action of researchers                                  | P                                                 | N                                                                         | Y                               | N                          | N        | N          | Y                                     | Y        | Y        |
| Talaulikar, 2004 <sup>54</sup>                          | N                                          | Y                                               | Action of researchers                                  | P                                                 | N                                                                         | Y                               | N                          | N        | N          | Y                                     | Y        | Y        |
| Masri, 2004 <sup>43</sup>                               | N                                          | Y                                               | Action of researchers                                  | P                                                 | N                                                                         | Y                               | N                          | N        | N          | Y                                     | Y        | Y        |
| Durlik, 2003 <sup>36</sup>                              | N                                          | Y                                               | Action of researchers                                  | P                                                 | N                                                                         | Y                               | N                          | N        | N          | Y                                     | Y        | Y        |
| Tsang, 2003 <sup>56</sup>                               | N                                          | Y                                               | Action of researchers                                  | P                                                 | N                                                                         | Probably yes                    | Y                          | Y        | N          | Y                                     | Y        | Y        |
| Roza, 2002 <sup>48</sup>                                | N                                          | Y                                               | Action of researchers                                  | P                                                 | N                                                                         | Y                               | Y                          | Y        | N          | Y                                     | Y        | Y        |
| Gaston, 1999 <sup>60</sup>                              | N                                          | Y                                               | Action of researchers                                  | P                                                 | N                                                                         | Probably yes                    | Y                          | Y        | N          | Y                                     | Y        | Y        |
| Pamugas, 2012 <sup>45</sup>                             | Y                                          | N                                               | Unclear                                                | P                                                 | Y<br>Matching on age, sex, primary renal disease, number of DR mismatches | Probably yes                    | Y                          | Y        | N          | Y                                     | Y        | Y        |
| Diarra 2010 <sup>35</sup>                               | N                                          | Y                                               | Healthcare decision makers and participant preferences | Unclear                                           | N                                                                         | Probably no                     | N                          | N        | N          | Y                                     | Y        | Y        |
| Kahn, 2010 Incident transplants sub-study <sup>39</sup> | Y                                          | N                                               | Time differences and healthcare                        | R                                                 | N                                                                         | Probably yes                    | N                          | Y        | N          | Y                                     | Y        | Y        |

|                                                                    |   |   |                                                                              |         |                                                                                      |              |   |   |   |   |   |   |
|--------------------------------------------------------------------|---|---|------------------------------------------------------------------------------|---------|--------------------------------------------------------------------------------------|--------------|---|---|---|---|---|---|
|                                                                    |   |   | decision makers                                                              |         |                                                                                      |              |   |   |   |   |   |   |
| Kahn, 2010<br>Prevalent<br>transplants sub-<br>study <sup>39</sup> | N | Y | Time differences and healthcare decision makers                              | R       | N                                                                                    | Probably yes | N | Y | N | Y | Y | Y |
| Spasovski, 2008 <sup>51</sup>                                      | Y | N | Time differences                                                             | R       | Y<br>Matching on age, gender and body weight                                         | Probably no  | Y | Y | Y | Y | Y | Y |
| Sharma, 2006 <sup>50</sup>                                         | Y | N | Unclear                                                                      | P       | Y<br>Matching on age and sex<br>No differences in other key baseline characteristics | Probably no  | Y | Y | Y | Y | Y | Y |
| Taber, 2005 <sup>53</sup>                                          | Y | N | Time differences                                                             | R       | Y<br>No differences in baseline characteristics                                      | Y            | Y | Y | Y | N | N | N |
| Carnahan, 2003 <sup>33</sup>                                       | N | Y | Healthcare decision makers (Medical centre formulary changes)                | P       | N                                                                                    | Probably yes | Y | Y | N | Y | Y | Y |
| Kraeuter, 2013 <sup>41</sup>                                       | N | Y | Participant preferences                                                      | R       | N                                                                                    | Probably yes | Y | Y | Y | Y | Y | Y |
| Rosenborg, 2014 <sup>69</sup>                                      | N | Y | Healthcare decision makers                                                   | P       | Y<br>To account for dose adjustments drug levels were normalized for dose            | Probably yes | Y | Y | N | Y | Y | Y |
| Mcdevitt-Potter, 2011 <sup>72</sup>                                | N | Y | Healthcare decision makers, location differences and participant preferences | P       | N                                                                                    | Probably yes | Y | Y | N | Y | Y | Y |
| Heavner, 2013 <sup>66</sup>                                        | Y | N | Time differences                                                             | Unclear | N                                                                                    | Y            | Y | Y | N | Y | Y | Y |
| Marfo, 2013 <sup>67</sup>                                          | Y | Y | Retail pharmacy switch                                                       | R       | N                                                                                    | Y            | Y | Y | N | Y | Y | Y |
| Connor, 2012 <sup>64</sup>                                         | Y | N | Healthcare decision                                                          | R       | Y<br>Matching on                                                                     | Probably no  | Y | Y | Y | Y | Y | Y |

|                               |   |   |                                                                                                    |                                           |                                                                                                     |              |   |   |   |   |   |   |
|-------------------------------|---|---|----------------------------------------------------------------------------------------------------|-------------------------------------------|-----------------------------------------------------------------------------------------------------|--------------|---|---|---|---|---|---|
|                               |   |   | makers and time differences (program switch due to cost)                                           |                                           | immunosuppression and deceased vs living donor                                                      |              |   |   |   |   |   |   |
| Momper, 2011 <sup>73</sup>    | N | Y | Unclear                                                                                            | R                                         | Y<br>Multivariable regression                                                                       | Probably yes | Y | Y | N | Y | Y | Y |
| Spence, 2012 <sup>70</sup>    | N | Y | Healthcare decision makers                                                                         | R                                         | N                                                                                                   | Y            | Y | Y | N | Y | Y | Y |
| Yu, 2012 <sup>71</sup>        | Y | N | Time and location differences (historical controls)                                                | P (generic group)<br>R (brand name group) | Y<br>Matching on age, disease type, gender, liver disease severity, graft to recipient weight ratio | Probably yes | Y | Y | Y | Y | Y | Y |
| Dhungel, 2013 <sup>65</sup>   | Y | N | Time differences (historical controls)                                                             | R                                         | N                                                                                                   | Probably no  | Y | Y | Y | Y | Y | Y |
| Videla, 2007 <sup>80</sup>    | N | Y | Action of researchers                                                                              | P                                         | N                                                                                                   | Probably yes | N | N | N | Y | Y | Y |
| Danguilan, 2014 <sup>79</sup> | Y | N | Time differences (historical controls)                                                             | P (generic group)<br>R (brand name group) | Y<br>Matching on age, gender, PRA and HLA typing                                                    | Probably yes | Y | Y | Y | Y | Y | Y |
| Rutkowski, 2011 <sup>77</sup> | Y | N | Unclear                                                                                            | Unclear                                   | Y<br>Matched based on donor (partner kidneys)                                                       | Probably no  | Y | Y | Y | Y | Y | N |
| Namgoong, 2013 <sup>76</sup>  | N | Y | Healthcare decision makers and time differences (program was switching from trade name to generic) | P                                         | N                                                                                                   | Probably yes | Y | Y | N | Y | Y | Y |

\*Did the study have a protocol? An answer of probably yes was given if the methods specified that the study received REB or IRB approval or if the study was interventional, but it was not specifically stated that the study had a protocol. An answer of probably no was given if there was no specific statement about REB/IRB approval or a protocol and the study was observational.

\*\*The outcome of acute rejection was often not analyzed due to a lack of events.
