# Supplementary material
Source: PubMed Central journal article supplement (PMC4794034)
Supplement: mola025321.ww5_default.pdf [file mola025321.ww5_default.pdf]

Appendix 5: Pharmacokinetic outcomes [posted as supplied by author]

Table A: Neoral pharmacokinetic outcomes

| Study, year, organ                     | Dose adjustments allowed (y/n) | One to one dose conversion (y/n)* | Number of patients with dose adjustments (I/G)§ | Time of outcome measurement                        | Dose* (mg/d)  |              | Weight normalized dose (mg/kg/d) |             | Trough level (C0) (ng/ml) |                | C2 (ng/ml)      |                 | AUC (0-4) (ng/ml)* h |                 | AUC (0-12) (ng/ml)* h |                 | Cmax (ng/ml) |               | Tmax (h)         |                  | Cmax mean ratio (90% CI) | AUC mean ratio (90% CI) |
|----------------------------------------|--------------------------------|-----------------------------------|-------------------------------------------------|----------------------------------------------------|---------------|--------------|----------------------------------|-------------|---------------------------|----------------|-----------------|-----------------|----------------------|-----------------|-----------------------|-----------------|--------------|---------------|------------------|------------------|--------------------------|-------------------------|
|                                        |                                |                                   |                                                 |                                                    | B             | G            | B                                | G           | B                         | G              | B               | G               | B                    | G               | B                     | G               | B            | G             | B                | G                | B                        | G                       |
| Khatami, 2013, kidney <sup>62</sup>    | Y                              | N/A                               | Unclear                                         | 12 months post transplant                          |               |              | 2.8 (1.1)                        | 2.6 (1.1)   | 152.8 (56.3)              | 176.1 (81.2)   | 675.59 (226.2)  | 725.0 (280.9)   |                      |                 |                       |                 |              |               |                  |                  |                          |                         |
| Vitko, 2010, kidney <sup>57</sup>      | Y                              | Y                                 | Unclear                                         | 180 days post randomization                        | 205.64 (85.0) | 208.5 (97.6) |                                  |             | 130.48 (26.1)             | 138.08 (32.22) | 669.13 (133.83) | 669.13 (133.83) |                      |                 |                       |                 |              |               |                  |                  |                          |                         |
| Qazi, 2006, kidney <sup>47</sup>       | Y                              | Y                                 | 0/13¶                                           | 2 weeks post randomization                         |               |              |                                  |             | 185 (98)                  | 195 (81)       |                 |                 |                      |                 |                       |                 |              |               |                  |                  |                          |                         |
| Hibberd, 2006, kidney <sup>38</sup>    | Unclear                        | Y                                 | Unclear                                         | Days 14 and 28                                     |               |              |                                  |             |                           |                |                 |                 | 3853.4 (1377.8)      | 3494.6 (1319.2) | 880.9 (368.2)         | 754.8 (301.4)   | 1.4 (0.6)    | 1.9 (0.8)     | 0.88 (0.8-0.97)  | 0.93 (0.88-0.98) |                          |                         |
| David-Neto, 2004, kidney <sup>54</sup> | N                              | Y                                 | N/A                                             | Day 0 and day 7                                    |               |              |                                  |             | 156 (81)                  | 160 (78)       | 734 (229)       | 708 (225)       |                      |                 | 3971 (1326)           | 4020 (1467)     | 1022 (357)   | 999 (377)     | 1.3 (0.3)        | 1.4 (0.3)        | 0.977                    | 1.012                   |
| First, 1998, kidney <sup>58</sup>      | N                              | Y                                 | N/A                                             | One week                                           |               |              |                                  |             |                           |                |                 |                 | 4377 (1579)          | 4120 (1508)     | 994 (391)             | 890 (332)       | 1.3 (0.4)    | 1.4 (0.6)     | 0.93 (0.84-1.02) | 0.95 (0.86-1.05) |                          |                         |
| Stephan, 1998, kidney <sup>52</sup>    | Y                              | N/A                               | Unclear                                         | One month post transplant                          |               |              | 6.55 (1.29)                      | 6.85 (1.37) | 245 (92.4)                | 296 (82)       |                 |                 |                      |                 |                       |                 | 1123 (256)   | 1055 (248)    | 1.81 (0.39)      | 1.80 (0.4)       |                          |                         |
| Kim, 1998, kidney <sup>40</sup>        | Unclear                        | N/A                               | Unclear                                         | Unclear when measured Total study duration 4 weeks |               |              |                                  |             |                           |                |                 |                 | 6528.3 (1087.6)      | 7274.2 (1805)   | 1650 (30.69)          | 1709.6 (24.9)   | 1.4 (0.4)    | 1.4 (0.4)     |                  |                  |                          |                         |
| Masri, 1996, kidney <sup>61</sup>      | Y                              | Unclear                           | 19/18                                           | One week post randomization                        |               |              | 3.61 (1.42)                      | 3.79 (1.46) | 165.3 (36.4)              | 158.1 (47.9)   |                 |                 |                      |                 |                       |                 | 795.2 (247)  | 638.3 (167.9) |                  |                  |                          |                         |
| Fisher, 1999, liver <sup>59</sup>      | Unclear                        | Y                                 | Unclear                                         | Unclear                                            |               |              |                                  |             | 143 (54)                  | 147 (58)       |                 |                 | 3572 (1448)          | 3397 (957)      | 589 (288)             | 503 (146)       | 2.9 (1.6)    | 3.1 (1.2)     | 0.93 (0.81-1.06) | 0.99 (0.89-1.09) |                          |                         |
| Leet, 2009, heart <sup>42</sup>        | Unclear                        | Y                                 | Unclear                                         | 14 days on each medication                         |               |              |                                  |             |                           |                |                 |                 |                      |                 |                       |                 |              |               |                  |                  | 1.30 (1.20-1.42)Ψ        | 1.17 (1.11-1.23)Ψ       |
| Toman, 2002, heart <sup>55</sup>       | Y                              | Y                                 | 11 (4/7)                                        | 12 weeks after randomization                       |               |              |                                  |             | 148 (34.3)                | 196.2 (88.5)   |                 |                 |                      |                 |                       |                 |              |               |                  |                  |                          |                         |
| Diarra, 2010, kidney <sup>35</sup>     | Unclear                        | Unclear                           | Unclear                                         | Pre conversion and 6 months post conversion        | 152.7 (50.9)  | 152.0 (52.2) |                                  |             | 87.53 (47.44)             | 81.51 (25.72)  |                 |                 |                      |                 |                       |                 |              |               |                  |                  |                          |                         |
| Al Wakeel, 2008, kidney <sup>32</sup>  | N                              | Y                                 | N/A                                             | Pre conversion and 14 days post conversion         |               |              |                                  |             | 117.2 (62.8)              | 115.6 (62.8)   |                 |                 |                      |                 | 3778.6 (1610.5)       | 3634.4 (1419.1) | 970.6 (39.7) | 898.4 (346.5) | 1.6 (0.7)        | 1.5 (0.7)        | 0.93 (0.8573-1.0358)     | 0.96 (0.9256-1.0355)    |

|                                        |         |   |                                                                        |                                                                                                                          |  |  |  |  |                 |                |                 |                  |                  |                  |                    |                    |             |                |             |           |                     |                                 |
|----------------------------------------|---------|---|------------------------------------------------------------------------|--------------------------------------------------------------------------------------------------------------------------|--|--|--|--|-----------------|----------------|-----------------|------------------|------------------|------------------|--------------------|--------------------|-------------|----------------|-------------|-----------|---------------------|---------------------------------|
| Al Wakeel, 2008, kidney <sup>31</sup>  | Y       | Y | 2                                                                      | Pre conversion and 14 days post conversion                                                                               |  |  |  |  | 171.1 (103.3)   | 177.1 (117.1)  | 760.3 (387.2)   | 706.5 (275.1)    |                  |                  |                    |                    |             |                |             |           |                     |                                 |
| Sayyah, 2007, kidney <sup>49</sup>     | Y       | Y | 0                                                                      | Pre conversion and 5 days post conversion                                                                                |  |  |  |  | 235.16 (144.89) | 193.17 (99.58) |                 |                  |                  |                  |                    |                    |             |                |             |           |                     |                                 |
| Masri, 2005, kidney <sup>44</sup>      | Unclear | Y | Unclear                                                                | 14 days pre and post conversion                                                                                          |  |  |  |  | 109.8 (14.41)   | 109.3 (17.26)  | 680.5 (0.5)     | 689 (6)          |                  |                  | 2856               | 2892               | 773         | 743            |             |           | (0.93-1.01)         | (0.99-1.06)<br>Only CI reported |
| Perlik, 2005, kidney <sup>46</sup>     | N       | Y | N/A                                                                    | C0 and C2: 2 weeks pre conversion and 3 days post conversion<br>AUC and Cmax: pre conversion and 14 days post conversion |  |  |  |  | 123             | 114            | 604             | 591              |                  |                  | 3039               | 3108               | 725         | 717            |             |           | 0.99 (0.93-1.05)    | 1.02 (0.99-1.06)                |
| Fradette, 2005, kidney <sup>37</sup>   | Unclear | Y | Unclear                                                                | 14 days pre and post conversion                                                                                          |  |  |  |  |                 |                |                 |                  |                  |                  | 3354.67 (32.3)     | 3243.63 (42.3)     | 841.06 (36) | 807.04 (43.1)  |             |           | 0.96 (0.886-1.061)  | 0.981 (0.93-1.036)              |
| Talaulikar, 2004, kidney <sup>54</sup> | Unclear | Y | Unclear                                                                | Pre conversion and 2 weeks post conversion                                                                               |  |  |  |  | 106 (48-188)**  | 98 (33-200)**  | 660 (73-1170)** | 736 (106-1096)** | 1730 (861-2980)* | 2180 (858-2750)* | 3000 (1490-5150)** | 3840 (1310-5090)** |             |                |             |           |                     | 1.01 (0.94-1.1)Ψ                |
| Masri, 2004, kidney <sup>43</sup>      | Unclear | Y | Unclear                                                                | C0 and C2: 7 days apart<br>AUC and Cmax: days 14 and 28                                                                  |  |  |  |  | 109.8 (14.41)   | 109.3 (17.26)  | 680.5 (0.5)     | 689 (6)          |                  |                  | 2856               | 2892               | 773         | 743            |             |           |                     |                                 |
| Carnahan, 2003, kidney <sup>33</sup>   | Y       | Y | Unclear for the whole group, 2 for subgroup >18 months post transplant | Pre conversion and at least 2 weeks post conversion                                                                      |  |  |  |  | 139             | 156            |                 |                  |                  |                  |                    |                    |             |                |             |           |                     |                                 |
| Durlik, 2003, kidney <sup>36</sup>     | Unclear | Y | Unclear                                                                | Pre conversion and 2 weeks post conversion                                                                               |  |  |  |  | 155 (31)        | 138 (30)       |                 |                  |                  |                  | 4421 (647)         | 3834 (767)         |             |                |             |           |                     |                                 |
| Tsang, 2003, kidney <sup>56</sup>      | Y       | Y | 0                                                                      | Days 1 and 8 (Neoral)<br>Days 21 and 28 (generic)                                                                        |  |  |  |  | 127 (50.1)      | 142.6 (49.1)   | 728 (220)       | 913.3 (359.7)    | 2421 (722)       | 2637 (846)       |                    |                    | 1007 (358)  | 1101.9 (425.6) | 1.53 (0.72) | 1.8 (0.9) | 1.09 (0.97-1.2)     | 1.09 (0.97-1.2)                 |
| Roza, 2002, kidney <sup>48</sup>       | Y       | Y | 0                                                                      | C0: Pre and 2 weeks post conversion<br>AUC, Cmax and Tmax: Days 14 and 28                                                |  |  |  |  | 198 (77)        | 198 (80)       |                 |                  |                  |                  | 5016 (1648)        | 5008 (1767)        | 1247 (405)  | 1246 (477)     | 1.5 (0.4)   | 1.6 (0.5) | 0.981 (0.922-1.044) | 0.992 (0.951-1.034)             |

|                                                       |   |     |         |                                                                                            |                |                |           |           |              |             |                |                |                |                |             |             |           |           |           |             |                          |                     |
|-------------------------------------------------------|---|-----|---------|--------------------------------------------------------------------------------------------|----------------|----------------|-----------|-----------|--------------|-------------|----------------|----------------|----------------|----------------|-------------|-------------|-----------|-----------|-----------|-------------|--------------------------|---------------------|
| Gaston, 1999, kidney <sup>60</sup>                    | N | Y   | N/A     | Pre conversion and one week post conversion                                                |                |                |           |           |              |             |                |                |                |                | 4377 (1579) | 4120 (1508) | 994 (391) | 890 (332) | 1.3 (0.4) | 1.4 (0.6)   | 0.93 (0.84-1.02)         | 0.95 (0.86-1.05)    |
| Pamugas, 2012, kidney <sup>45</sup>                   | Y | N/A | Unclear | AUC (0-4), Cmax, Tmax: 4 days post transplant<br>Other outcomes: one month post transplant | 251.7 (83.5)   | 275.8 (67.9)   |           |           |              |             | 1563.5 (621)   | 1455.1 (305)   | 3169.7 (0.356) | 3663.1 (0.352) |             |             | 1152.3 2  | 1451.6 4  | 2.0 (0.3) | 1.87 (0.27) | 0.968 (0.900-1.127)<br>Ψ | 0.988 (0.953-1.08)Ψ |
| Kahn, 2010, kidney, incident transplants <sup>3</sup> | Y | N/A | Unclear | One week post transplant                                                                   | 268            | 283            |           |           | 192          | 213         |                |                |                |                |             |             |           |           |           |             |                          |                     |
| Kahn, 2010, kidney, stable transplant <sup>39</sup>   | Y | Y   | Unclear | One month pre and post conversion                                                          | 53 (4)         | 56 (4)         |           |           | 133 (7)      | 132 (8)     |                |                |                |                |             |             |           |           |           |             |                          |                     |
| Spasovski, 2008, kidney <sup>51</sup>                 | Y | N/A | Unclear | 6 months post transplant                                                                   | 147.8 (29.9)   | 191.7 (4.1)    |           |           |              |             | 793.2 (139.8)  | 597.7 (93.4)   |                |                |             |             |           |           |           |             |                          |                     |
| Sharma, 2006, kidney <sup>50</sup>                    | Y | N/A | Unclear | 3 months                                                                                   |                |                | 5.9 (2.2) | 6.2 (1.4) |              |             | 1342.4 (303.4) | 1306.7 (254.4) |                |                |             |             |           |           |           |             |                          |                     |
| Kraeuter, 2013, heart <sup>41</sup>                   | Y | Y   | 17      | 8 months pre and post conversion                                                           | 140.67 (39.81) | 134.58 (41.61) |           |           | 102.2 (39.6) | 79.7 (24.9) |                |                |                |                |             |             |           |           |           |             |                          |                     |

All continuous variables are reported as mean and standard deviation (SD) unless otherwise specified

\*Listed as N/A (not applicable) if the study was a parallel group trial or cohort study in incident transplants. Dose is only reported for studies that allowed dose adjustments and where values for the innovator and generic groups were clearly reported.

§Reported as total number of dose changes post conversion from innovator to generic or as total number in the innovator group and total number in the generic group (I/G), where I=Innovator and G=generic

¶Dose adjustments occurred after measurement of outcome

Ψmean ratio and 95% confidence interval

\*\*median (IQR)

CV= coefficient of variation

C2= drug level 2 hours after administration

AUC= area under the curve

Cmax= maximum concentration

An empty cell indicates that the outcome was not reported



All continuous variables are reported as mean and standard deviation (SD) unless otherwise specified

\*Listed as N/A (not applicable) if the study was a parallel group trial or cohort study. Dose is only reported for studies that allowed dose adjustments and where values for the innovator and generic groups were reported.

§Reported as total number of dose changes post conversion from trade name to generic or as total number in the brand name group and total number in the generic group (B/G), where B=brand name and G=generic

¶Dose adjustments occurred after measurement of outcomes

Ψmean and 95% confidence interval

\*\*median (IQR)

CV= coefficient of variation

AUC= area under the curve

Cmax= maximum concentration

An empty cell indicates that the outcome was not reported

Table C: Cellcept pharmacokinetic outcomes

| Study, year, organ                          | Dose adjustments allowed (y/n) | One to one dose conversion (y/n)* | Number of patients with dose changes (I/G)§ | Timing of outcome measurements             | Pre dose 12 h MPA (µg/ml) |             | AUC (0-3) (µg/ml)* h |       | AUC (0-6) (µg/ml)* h |               | AUC (0-12) (µg/ml)* h |               | Cmax (µg/ml) |              | Tmax (h)    |             | Cmax mean ratio (90% CI) | AUC mean ratio (0-6) (90% CI) | AUC mean ratio (0-12) (90% CI) |
|---------------------------------------------|--------------------------------|-----------------------------------|---------------------------------------------|--------------------------------------------|---------------------------|-------------|----------------------|-------|----------------------|---------------|-----------------------|---------------|--------------|--------------|-------------|-------------|--------------------------|-------------------------------|--------------------------------|
|                                             |                                |                                   |                                             |                                            | I                         | G           | I                    | G     | I                    | G             | I                     | G             | I            | G            | I           | G           |                          |                               |                                |
| Sunder-Plassman, 2012, kidney <sup>78</sup> | Unclear                        | Unclear                           | Unclear                                     | Study day 1, 14, 28, 70, 112               | 2.69 (1.7)                | 3.00 (2.09) |                      |       | 33.52 (15.13)        | 31.10 (15.42) | 49.85 (20.83)         | 48.26 (21.22) | 16.19 (9.95) | 14.31 (8.34) | 1.12 (0.75) | 1.34 (1.14) | 0.873 (0.787-0.968)      | 0.923 (0.865-0.984)           | 0.959 (0.899-1.023)            |
| Abdallah, 2010, kidney <sup>75</sup>        | Unclear                        | N/A                               | Unclear                                     | Study days 0, 7, 30, 90 and 180            |                           |             | 27.76                | 26.12 |                      |               |                       |               |              |              |             |             |                          |                               |                                |
| Videla, 2007, kidney <sup>80</sup>          | Unclear                        | Y                                 | Unclear                                     | Pre conversion and 60 days post conversion | 3.36 (1.41)               | 3.84 (0.62) |                      |       | 22.69 (13.7)         | 24.81 (6.67)  |                       |               |              |              |             |             |                          |                               |                                |
| Danguilan, 2014, kidney <sup>79</sup>       | N                              | N/A                               | 0                                           | Unclear                                    |                           |             | 38.21                | 36.78 |                      |               |                       |               | 7.88         | 6.92         | 1.07        | 1.03        |                          |                               |                                |
| Rutkowski, 2011, kidney <sup>77</sup>       | Y                              | N/A                               | (11/8)¶                                     | Unclear                                    | 7.15                      | 6.70        |                      |       |                      |               |                       |               |              |              |             |             |                          |                               |                                |
| Namgoong, 2013, liver <sup>76</sup>         | Unclear                        | Y                                 | Unclear                                     | 3 months pre and post conversion           | 1.71 (0.88)               | 1.83 (0.91) |                      |       |                      |               |                       |               |              |              |             |             |                          |                               |                                |

All continuous variables are reported as mean and standard deviation (SD) unless otherwise specified

\*Listed as N/A (not applicable) if the study was a parallel group trial or cohort study. Dose is only reported for studies that allowed dose adjustments and where values for the trade name and generic groups were reported.

§Reported as total number of dose changes post conversion from innovator to generic or as total number in the innovator group and total number in the generic group (I/G), where I=innovator and G=generic

¶Dose adjustments occurred after measurement of outcomes

Ψmean and 95% confidence interval

\*\*median (IQR)

CV= coefficient of variation

AUC= area under the curve

Cmax= maximum concentration

MPA= mycophenolic acid

An empty cell indicates that the outcome was not reported
