# Supplementary material
Source: PubMed Central journal article supplement (PMC4794034)
Supplement: mola025321.ww6_default.pdf [file mola025321.ww6_default.pdf]

**Appendix 6: Clinical outcomes [posted as supplied by author]**

Table A: Neoral clinical outcomes

| Study, year, organ                    | Definition of acute rejection | Trial (y/n)                     | Follow up time             | Number of patients analyzed (I/G) | Neoral                 | Generic                 |
|---------------------------------------|-------------------------------|---------------------------------|----------------------------|-----------------------------------|------------------------|-------------------------|
| <b>Acute Rejection</b>                |                               |                                 |                            |                                   |                        |                         |
| Khatami, 2013, kidney <sup>62</sup>   | Clinical +/- biopsy           | Y                               | 1 year                     | 221 (110/111)                     | 16                     | 16                      |
| Vitko, 2010, kidney <sup>57</sup>     | Unclear                       | Y                               | 180 days                   | 99 (52/47)                        | 0                      | 0                       |
| Kim, 1998, kidney <sup>40</sup>       | Unclear                       | Y                               | 4 weeks                    | 40 (20/20)                        | 2                      | 1                       |
| Stephan, 1998, kidney <sup>52</sup>   | Unclear                       | Y (but only 40 were randomized) | 1 year                     | 52 (20/32)                        | 6 biopsied, 9 presumed | 5 biopsied, 14 presumed |
| Leet, 2009, heart <sup>42</sup>       | Biopsy proven                 | Y                               | 4 weeks                    | 16                                | 0                      | 0                       |
| Toman, 2002, heart <sup>55</sup>      | Biopsy proven                 | Y                               | 12 weeks                   | 11 (6/5)                          | 0                      | 0                       |
| Al Wakeel, 2008, kidney <sup>31</sup> | Clinical +/- biopsy           | N                               | 6 months                   | 75                                | 8                      | 2                       |
| Sayyah, 2007, kidney <sup>49</sup>    | Unclear                       | N                               | 6 months                   | 41                                | 0                      | 0                       |
| Carnahan, 2003, kidney <sup>33</sup>  | Unclear                       | N                               | Average follow up 18 weeks | 41                                | 0                      | 0                       |
| Tsang, 2003, kidney <sup>56</sup>     | Unclear                       | N                               | 4 weeks                    | 20                                | 0                      | 0                       |
| Roza, 2002, kidney <sup>48</sup>      | Unclear                       | N                               | 29 days (2 weeks on each)  | 50                                | 0                      | 0                       |
| Pamugas, 2012, kidney <sup>45</sup>   | Biopsy proven                 | N                               | 6 months                   | 60 (30/30)                        | 4                      | 2                       |
| Spasovski, 2008, kidney <sup>51</sup> | Unclear                       | N                               | 6 months                   | 31 (16/15)                        | 4                      | 9                       |
| Sharma, 2006, kidney <sup>50</sup>    | Biopsy proven                 | N                               | 1 year                     | 37 (17/20)                        | 8                      | 6                       |
| Taber, 2005, kidney <sup>53</sup>     | Biopsy proven                 | N                               | 6 months                   | 188 (100/88)                      | 25                     | 34                      |
| Kraeuter, 2013, heart <sup>41</sup>   | Biopsy proven                 | N                               | 8 months                   | 20                                | 0                      | 0                       |
| <b>Graft loss (n)</b>                 |                               |                                 |                            |                                   |                        |                         |
| Khatami, 2013, kidney <sup>62</sup>   |                               | Y                               | 1 year                     | 221 (110/111)                     | 1                      | 0                       |
| Kim, 1998, kidney <sup>40</sup>       |                               | Y                               | 4 weeks                    | 40 (20/20)                        | 0                      | 0                       |
| Stephan, 1998, kidney <sup>52</sup>   |                               | Y                               | 1 year                     | 52 (20/32)                        | 0                      | 0                       |
| Al Wakeel, 2008, kidney <sup>31</sup> |                               | N                               | 6 months                   | 75                                | 0                      | 0                       |
| Pamugas, 2012, kidney <sup>45</sup>   |                               | N                               | 6 months                   | 60 (30/30)                        | 0                      | 0                       |
| Sharma, 2006, kidney <sup>50</sup>    |                               | N                               | 1 year                     | 37 (17/20)                        | 1                      | 0                       |
| Toman, 2002, heart <sup>55</sup>      |                               | Y                               | 12 weeks                   | 11 (6/5)                          | 0                      | 0                       |
| Kraeuter, 2013, heart <sup>41</sup>   |                               | N                               | 8 months                   | 20                                | 0                      | 0                       |
| <b>Death (n)</b>                      |                               |                                 |                            |                                   |                        |                         |
| Khatami, 2013, kidney <sup>62</sup>   |                               | Y                               | 1 year                     | 221 (110/111)                     | 1                      | 1                       |
| Vitko, 2010, kidney <sup>57</sup>     |                               | Y                               | 180 days                   | 99 (52/47)                        | 1                      | 0                       |
| Stephan, 1998, kidney <sup>52</sup>   |                               | Y                               | 1 year                     | 52 (20/32)                        | 0                      | 0                       |
| Al Wakeel, 2008, kidney <sup>31</sup> |                               | N                               | 6 months                   | 75                                | 0                      | 0                       |
| Roza, 2002, kidney <sup>48</sup>      |                               | N                               | 29 days                    | 50                                | 0                      | 0                       |
| Pamugas, 2012, kidney <sup>45</sup>   |                               | N                               | 6 months                   | 60 (30/30)                        | 0                      | 1                       |
| Sharma, 2006, kidney <sup>50</sup>    |                               | N                               | 1 year                     | 37 (17/20)                        | 0                      | 0                       |
| Toman, 2002, heart <sup>50</sup>      |                               | Y                               | 12 weeks                   | 11 (6/5)                          | 0                      | 0                       |
| Kraeuter, 2013, heart <sup>41</sup>   |                               | N                               | 8 months                   | 20                                | 0                      | 0                       |
| <b>Infection (n)</b>                  |                               |                                 |                            |                                   |                        |                         |
| Khatami, 2013, kidney <sup>62</sup>   |                               | Y                               | 1 year                     | 221 (110/111)                     | 7                      | 9                       |
| Vitko, 2010, kidney <sup>57</sup>     |                               | Y                               | 180 days                   | 99 (52/47)                        | 7                      | 7                       |
| Fradette, 2005, kidney <sup>37</sup>  |                               | N                               | 35 days                    | 37                                | 2                      | 1                       |

|                                                         |  |                                                  |                                           |               |                 |                 |
|---------------------------------------------------------|--|--------------------------------------------------|-------------------------------------------|---------------|-----------------|-----------------|
| Pamugas, 2012, kidney <sup>45</sup>                     |  | N                                                | 6 months                                  | 60 (30/30)    | 8               | 4               |
| Toman, 2002, heart <sup>35</sup>                        |  | Y                                                | 12 weeks                                  | 11 (6/5)      | 0               | 1               |
| <b>eGFR (ml/min/1.73m<sup>2</sup>)</b>                  |  |                                                  |                                           |               |                 |                 |
| Pamugas, 2012, kidney <sup>45</sup>                     |  | N                                                | 6 months                                  | 60 (30/30)    | 62.03 (12.1)    | 74.02 (15.8)    |
| Kraeuter, 2013, heart <sup>41</sup>                     |  | N                                                | 8 months                                  | 20            | 59.93 (21.98)   | 59.57 (20.23)   |
| <b>Serum creatinine (µmol/L)</b>                        |  |                                                  |                                           |               |                 |                 |
| Khatami, 2013, kidney <sup>62</sup>                     |  | Y                                                | 1 year                                    | 221 (110/111) | 117.5 (53.0)    | 107.8 (17.6)    |
| Qazi, 2006, kidney <sup>47</sup>                        |  | Y (randomized to switch to generic vs no switch) | 4 weeks post randomization                | 82 (9/73)     | 153.82 (106.08) | 146.74 (43.32)  |
| First, 1998, kidney <sup>38</sup>                       |  | Y                                                | 3 weeks                                   | 32            | 123.76 (35.36)  | 123.76 (35.36)  |
| Kim, 1998, kidney <sup>40</sup>                         |  | Y                                                | 1 week                                    | 40 (20/20)    | 118.46 (37.13)  | 101.66 (15.03)  |
| Stephan, 1998, kidney <sup>52</sup>                     |  | Y                                                | 6 months                                  | 52 (20/32)    | 107.85 (21.22)  | 106.96 (18.56)  |
| Masri, 1996, kidney <sup>61</sup>                       |  | Y                                                | One year post randomization               | 44 (21/23)    | 140.56 (35.36)  | 129.06 (29.17)  |
| Diarra, 2010, kidney <sup>35</sup>                      |  | N                                                | 1 month                                   | 59            | 165.48 (89.77)  | 164.48 (89.0)   |
| Diarra, 2010, kidney <sup>35</sup>                      |  | N                                                | 3 months                                  | 59            | 165.48 (89.77)  | 167.82 (100)    |
| Diarra, 2010, kidney <sup>35</sup>                      |  | N                                                | 6 months                                  | 59            | 165.48 (89.77)  | 176.41 (119.43) |
| Al Wakeel, 2008, kidney <sup>31</sup>                   |  | N                                                | 6 months                                  | 75            | 116.1 (29.5)    | 119.8 (32.1)    |
| Sayyah, 2007, kidney <sup>49</sup>                      |  | N                                                | 6 months pre and post conversion          | 41            | 123.76 (42.4)   | 118.46 (35.4)   |
| Masri, 2005, kidney <sup>44</sup>                       |  | N                                                | Pre conversion and 7 days post conversion | 70            | 108.73          | 109.62          |
| Masri, 2004, kidney <sup>43</sup>                       |  | N                                                | 21 days                                   | Unclear       | 108.73          | 109.62          |
| Carnahan, 2003, kidney <sup>33</sup>                    |  | N                                                | 2 weeks                                   | 41            | 151.16          | 148.51          |
| Tsang, 2003, kidney <sup>36</sup>                       |  | N                                                | 2 weeks                                   | 20            | 120.4 (41.3)    | 118.5 (43.1)    |
| Roza, 2002, kidney <sup>48</sup>                        |  | N                                                | 2 weeks                                   | 50            | 115.80 (41.55)  | 114.04 (38.98)  |
| Pamugas, 2012, kidney <sup>45</sup>                     |  | N                                                | 6 months                                  | 60 (30/30)    | 108.73 (38.90)  | 99.01 (22.10)   |
| Kahn, 2010, kidney, prevalent transplants <sup>39</sup> |  | N                                                | 1 month pre and post conversion           | 117           | 142 (6)         | 135 (5)         |
| Spasovski, 2008, kidney <sup>51</sup>                   |  | N                                                | 6 months                                  | 31 (16/15)    | 127.5 (43.5)    | 155.5 (68.6)    |
| Sharma, 2006, kidney <sup>50</sup>                      |  | N                                                | 1 year                                    | 37 (17/20)    | 132.6 (141.44)  | 123.76 (53.04)  |
| Kraeuter, 2013, heart <sup>41</sup>                     |  | N                                                | 8 months                                  | 20            | 113.15 (29.17)  | 112.27 (32.71)  |

All continuous variables are reported as mean and standard deviation (SD) unless otherwise specified  
I/G, I=Innovator, G=generic

Table B: Prograf clinical outcomes

| Study, year, organ                                              | Definition of acute rejection        | Trial | Follow up time  | Number of patients analyzed (I/G) | Prograf        | Generic         |
|-----------------------------------------------------------------|--------------------------------------|-------|-----------------|-----------------------------------|----------------|-----------------|
| <b>Acute rejection</b>                                          |                                      |       |                 |                                   |                |                 |
| Min, 2013, kidney <sup>68</sup>                                 | Biopsy proven with clinical evidence | Y     | 6 months        | 93 (38/55)                        | 2              | 2               |
| Alloway, 2012, kidney <sup>63</sup>                             | Unclear                              | Y     | 28 days         | 71                                | 0              | 0               |
| Rosenborg, 2014, kidney <sup>69</sup>                           | Unclear                              | N     | 4 weeks         | 67                                | 0              | 0               |
| McDevitt-Potter, 2011, kidney, liver, multiorgan <sup>72</sup>  | Biopsy proven                        | N     | Unclear         | 70                                | 0              | 0               |
| Heavner, 2013, kidney <sup>66</sup>                             | Biopsy proven                        | N     | 6 months        | 78 (42/36)                        | 1              | 0               |
| Marfo, 2013, kidney <sup>67</sup>                               | Biopsy proven                        | N     | 1 year          | 106 (33/73)                       | 0              | 1               |
| Connor, 2012, kidney <sup>64</sup>                              | Biopsy proven                        | N     | 6 months        | 99 (48/51)                        | 8              | 9               |
| Spence, 2012, kidney, liver, heart <sup>70</sup>                | Biopsy proven                        | N     | 106 days        | 234                               | 0              | 0               |
| Momper, 2011, kidney, liver <sup>73</sup>                       | Unclear                              | N     | Average 50 days | 103                               | 0              | 0               |
| Yu, 2012, liver <sup>71</sup>                                   | Biopsy proven                        | N     | 26 weeks        | 117 (60/57)                       | 5              | 0               |
| <b>Acute cellular rejection 1R (mean episodes/ patient day)</b> |                                      |       |                 |                                   |                |                 |
| DhungeI, 2012, heart <sup>65</sup>                              | Biopsy proven                        | N     | 6 months        | 65 (44/21)                        | 0.022 (0.01)   | 0.023 (0.01)    |
| <b>Acute cellular rejection 2R (mean episodes/ patient day)</b> |                                      |       |                 |                                   |                |                 |
| DhungeI, 2012, heart <sup>65</sup>                              | Biopsy proven                        | N     | 6 months        | 65 (44/21)                        | 0.0002 (0.001) | 0.0011 (0.0025) |
| <b>Acute cellular rejection 3R (mean episodes/ patient day)</b> |                                      |       |                 |                                   |                |                 |
| DhungeI, 2012, heart <sup>65</sup>                              | Biopsy proven                        | N     | 6 months        | 65 (44/21)                        | 0.0002 (0.001) | 0               |
| <b>Graft loss</b>                                               |                                      |       |                 |                                   |                |                 |
| Min, 2013, kidney <sup>68</sup>                                 |                                      | Y     | 6 months        | 93 (38/55)                        | 0              | 0               |
| Alloway, 2012, kidney <sup>63</sup>                             |                                      | Y     | 28 days         | 71 (36/35)                        | 0              | 0               |
| Connor, 2012, kidney <sup>64</sup>                              |                                      |       | 6 months        | 99 (48/51)                        | 6              | 8               |
| Yu, 2012, liver <sup>71</sup>                                   |                                      | N     | 6 months        | 117 (60/57)                       | 0              | 0               |
| <b>Death</b>                                                    |                                      |       |                 |                                   |                |                 |
| Min, 2013, kidney <sup>68</sup>                                 |                                      | Y     | 6 months        | 93 (38/55)                        | 1              | 0               |
| Connor, 2012, kidney <sup>64</sup>                              |                                      | N     | 6 months        | 99 (48/51)                        | 2              | 2               |
| Spence, 2012, kidney, liver, heart <sup>70</sup>                |                                      | N     | 106 days        | 234                               | 0              | 0               |
| Yu, 2012, liver <sup>71</sup>                                   |                                      | N     | 6 months        | 117 (60/57)                       | 0              | 0               |
| DhungeI, 2012, heart <sup>65</sup>                              |                                      | N     | 6 months        | 65 (44/21)                        | 2              | 2               |
| <b>Infection</b>                                                |                                      |       |                 |                                   |                |                 |
| Min, 2013 <sup>68</sup>                                         |                                      | Y     | 6 months        | 126 (63/63)                       | 10             | 8               |
| Marfo, 2013, kidney <sup>67</sup>                               |                                      | N     | 90 days         | 73                                | 10             | 12              |
| Connor, 2012, kidney <sup>59</sup>                              |                                      | N     | 6 months        | 99 (48/51)                        | 4**            | 4**             |
| DhungeI, 2012, heart <sup>60</sup>                              |                                      | N     | 6 months        | 65 (44/21)                        | 8              | 1               |
| <b>eGFR (ml/min/1.73m2)</b>                                     |                                      |       |                 |                                   |                |                 |
| Min, 2013, kidney <sup>63</sup>                                 |                                      | Y     | 6 months        | 93 (38/55)                        | 66.3 (18.5)    | 64.4 (16.7)     |
| Rosenborg, 2014, kidney <sup>64</sup>                           |                                      | N     | 4 weeks         | 67                                | 51 (47-55)#    | 51 (47-55)#     |
| Connor, 2012, kidney <sup>64</sup>                              |                                      | N     | 6 months        | 99 (48/51)                        | 54.3 (20.2)    | 47.4 (15.2)     |
| <b>Serum creatinine (µmol/L)</b>                                |                                      |       |                 |                                   |                |                 |
| Rosenborg, 2014, kidney <sup>69</sup>                           |                                      | N     | 4 weeks         | 67                                | 129 (118-140)# | 131 (119-143)#  |

|                                                  |  |   |                 |            |                    |                 |
|--------------------------------------------------|--|---|-----------------|------------|--------------------|-----------------|
| Marfo, 2013, kidney <sup>67</sup>                |  | N | 90 days         | 73         | 133.48 (48.62)     | 137.02 (58.34)  |
| Connor, 2012, kidney <sup>64</sup>               |  | N | 6 months        | 99 (48/51) | 127 (111.8-157.2)* | 112 (96-167)*   |
| Spence, 2012, kidney, liver, heart <sup>70</sup> |  | N | 106 days        | 234        | 117.57 (42.43)     | 120.22 (72.49)  |
| Momper, 2011, kidney <sup>73</sup>               |  | N | Average 50 days | 55         | 136.14 (68.95)     | 134.37 (69.84)  |
| Momper, 2011, liver <sup>73</sup>                |  | N | Average 50 days | 48         | 142.32 (109.62)    | 144.09 (116.69) |

All continuous variables are reported as mean and standard deviation (SD) unless otherwise specified

# mean (95% confidence interval)

\*median (IQR)

\*\*CMV disease

I/G, I=Innovator, G=generic

Table C: Cellcept clinical outcomes

| Study, year, organ                           | Definition of acute rejection     | Trial (y/n) | Follow up time                                | Number of patients analyzed (I/G) | Cellcept               | Generic                |
|----------------------------------------------|-----------------------------------|-------------|-----------------------------------------------|-----------------------------------|------------------------|------------------------|
| <b>Acute rejection</b>                       |                                   |             |                                               |                                   |                        |                        |
| Abdallah, 2010, kidney <sup>75</sup>         | Not specified                     | Y           | 2 years                                       | 18 (10/8)                         | 1                      | 1                      |
| Danguilan, 2014, kidney <sup>79</sup>        | Not specified                     | N           | 6 months                                      | 40 (20/20)                        | 3                      | 1                      |
| Rutkowski, 2011, kidney <sup>77</sup>        | Clinical manifestations or biopsy | N           | 6 months                                      | 30 (15/15)                        | 2-clinical<br>1-biopsy | 3-clinical<br>1-biopsy |
| Namgoong, 2013, liver <sup>76</sup>          | Not specified                     | N           | 3 months                                      | 47                                | 0                      | 0                      |
| <b>Graft loss</b>                            |                                   |             |                                               |                                   |                        |                        |
| Danguilan, 2014, kidney <sup>79</sup>        |                                   | N           | 6 months                                      | 40 (20/20)                        | 0                      | 0                      |
| <b>Death</b>                                 |                                   |             |                                               |                                   |                        |                        |
| Sunder-Plassmann, 2012, kidney <sup>78</sup> |                                   | Y           | 112 days                                      | 43                                | 0                      | 0                      |
| Abdallah, 2010, kidney <sup>75</sup>         |                                   | Y           | 2 years                                       | 18 (10/8)                         | 0                      | 0                      |
| Danguilan, 2014, kidney <sup>79</sup>        |                                   | N           | 6 months                                      | 40 (20/20)                        | 0                      | 1                      |
| Rutkowski, 2011, kidney <sup>77</sup>        |                                   | N           | 6 months                                      | 30 (15/15)                        | 1                      | 1                      |
| <b>Infection</b>                             |                                   |             |                                               |                                   |                        |                        |
| Abdallah, 2010, kidney <sup>75</sup>         |                                   | Y           | 2 years                                       | 18 (10/8)                         | 14 (episodes)          | 9 (episodes)           |
| Danguilan, 2014, kidney <sup>79</sup>        |                                   | N           | 6 months                                      | 40 (20/20)                        | 3                      | 5                      |
| Rutkowski, 2011, kidney <sup>77</sup>        |                                   | N           | 6 months                                      | 30 (15/15)                        | 7                      | 7                      |
| <b>eGFR (ml/min/1.73m<sup>2</sup>)</b>       |                                   |             |                                               |                                   |                        |                        |
| Rutkowski, 2011, kidney <sup>77</sup>        |                                   | N           | 6 months                                      | 50 (15/15)                        | 58.3                   | 63                     |
| <b>Serum creatinine (µmol/L)</b>             |                                   |             |                                               |                                   |                        |                        |
| Abdallah, 2010, kidney <sup>75</sup>         |                                   | Y           | 6 months                                      | 18 (10/8)                         | 104.48                 | 121.89                 |
| Abdallah, 2010, kidney <sup>75</sup>         |                                   | Y           | 1 month                                       | 18 (10/8)                         | 202.55                 | 131.06                 |
| Videla, 2007, kidney <sup>80</sup>           |                                   | N           | Before conversion and 60 days post conversion | Unclear                           | 160 (24.75)            | 134.37 (15.03)         |
| Rutkowski, 2011, kidney <sup>77</sup>        |                                   | N           | 6 months                                      | 30 (15/15)                        | 120.22                 | 114.92                 |

All continuous variables are reported as mean and standard deviation (SD) unless otherwise specified. I/G, B=innovator, G=generic
